# Supplementary material for: North American Public Opinion Survey on the Acceptability of Crowdsourcing Basic Life Support for Out-of-Hospital Cardiac Arrest With the PulsePoint Mobile Phone App
Source: PubMed Central journal article supplement (PMC5451638; doi:10.2196/mhealth.6926), 2017-05-17
Supplement: mhealth_v5i5e63_app2.pdf [file mhealth_v5i5e63_app2.pdf]

**TABLE 3:** Weighted regression analysis for USA population

| PREDICTOR VARIABLES      |                                                          | COMFORT IN A PUBLIC SETTING<br>Multivariable Model <sup>a</sup> |         | COMFORT IN A PRIVATE SETTING<br>Multivariable Model <sup>b</sup> |         |
|--------------------------|----------------------------------------------------------|-----------------------------------------------------------------|---------|------------------------------------------------------------------|---------|
|                          |                                                          | OR (95%CI)                                                      | P value | OR (95%CI)                                                       | P value |
| <b>SEX</b>               | Base: Female (vs. Male)                                  | 1.3 (0.81;2.2)                                                  | .26     | 1.7 (1.2;2.4)                                                    | .004    |
| <b>EDUCATION LEVEL</b>   | Base: High School or less (vs. Post secondary education) | 1.0 (0.60;1.7)                                                  | .99     | 0.91(0.61;1.4)                                                   | .65     |
| <b>HOUSAEHOLD INCOME</b> | Base: <\$49,000                                          |                                                                 |         |                                                                  |         |
|                          | \$50,000-\$99,999                                        | 0.88 (0.53;1.46)                                                | .63     | 0.95 (0.64;1.4)                                                  | .81     |
|                          | \$100,000 or more                                        | 1.1 (0.56;2.2)                                                  | .32     | 0.64 (0.39;1.1)                                                  | .079    |
| <b>EMPLOYMENT TYPE</b>   | Base: Not currently employed                             |                                                                 |         |                                                                  |         |
|                          | Student or Military                                      | 3.1 (0.59;16)                                                   | .18     | 1.3 (0.53;3.4)                                                   | .54     |
|                          | Employed                                                 | 0.67 (0.38;1.2)                                                 | .17     | 0.85 (0.58;1.2)                                                  | .40     |
| <b>CHILDREN</b>          | Base: No children (vs. at least one child)               | 0.87 (0.48;1.5)                                                 | .63     | 1.3 (0.85;2.1)                                                   | .20     |
| <b>AGE GROUP</b>         | (Base: Age 18-34)                                        |                                                                 |         |                                                                  |         |
|                          | Age 35-54                                                | 1.5 (0.86;2.7)                                                  | .15     | 1.2 (0.77;1.9)                                                   | .43     |
|                          | Age 55+                                                  | 1.2 (0.61;2.5)                                                  | .57     | 0.84 (0.5;1.4)                                                   | .50     |
| <b>MARITAL STATUS</b>    | Base: Single, never married                              |                                                                 |         |                                                                  |         |
|                          | Married or Co-habiting                                   | 1.5 (0.82;2.8)                                                  | .18     | 1.7 (1.1;2.8)                                                    | 0.027   |
|                          | Widowed, Separated, Divorced                             | 1.0 (0.47;2.1)                                                  | 1.0     | 1.6 (0.89;3.0)                                                   | 0.12    |
| <b>RACE</b>              | Base: Caucasian (vs. Other)                              | 1.3 (0.70;2.2)                                                  | .44     | 0.82(0.54;1.3)                                                   | 0.37    |

a: Multivariable Model; Comfort in Public Setting: Omnibus F-test:  $F(12,1283)=1.28$ ;  $p=0.22$ . Goodness of Fit F-test:  $F(9,1286)=0.77$ ;  $p=0.64$

b: **Multivariable Model**; Comfort in Private Setting:  $F(12;1283)=2.0$ ;  $p=0.02$ . Goodness of Fit F-test  $F(9,1286) =0.93$ ;  $p=0.50$
