# Supplementary material for: North American Public Opinion Survey on the Acceptability of Crowdsourcing Basic Life Support for Out-of-Hospital Cardiac Arrest With the PulsePoint Mobile Phone App
Source: PubMed Central journal article supplement (PMC5451638; doi:10.2196/mhealth.6926), 2017-05-17
Supplement: mhealth_v5i5e63_app3.pdf [file mhealth_v5i5e63_app3.pdf]

**TABLE 4:** Weighted regression analysis for Canadian population

|                                | PREDICTOR VARIABLES                                      | COMFORT IN A PUBLIC SETTING<br>Multivariable Model <sup>a</sup> |         | COMFORT IN A PRIVATE SETTING<br>Multivariable Model <sup>b</sup> |         |
|--------------------------------|----------------------------------------------------------|-----------------------------------------------------------------|---------|------------------------------------------------------------------|---------|
|                                |                                                          | OR (95%CI)                                                      | P value | OR (95%CI)                                                       | P value |
| <b>SEX</b>                     | Base: Female (vs. Male)                                  | 1.2 (0.62;2.3)                                                  | .62     | 2.3 (1.3;3.9)                                                    | .003    |
| <b>EDUCATION LEVEL</b>         | Base: High School or less (vs. Post secondary education) | 0.53 (0.25;1.1)                                                 | .10     | 0.79 (0.45;1.4)                                                  | .42     |
| <b>HOUSAEHOLD INCOME</b>       | Base: <\$49,000                                          |                                                                 |         |                                                                  |         |
|                                | \$50,000-\$99,999                                        | 1.0 (0.52;2.1)                                                  | .92     | 0.51 (0.28;0.92)                                                 | .024    |
|                                | \$100,000 or more                                        | 2.3 (0.80;6.6)                                                  | .12     | 1.0 (0.47;2.1)                                                   | 1.0     |
| <b>EMPLOYMENT TYPE</b>         | Base: Not currently employed                             |                                                                 |         |                                                                  |         |
|                                | Student or Military                                      | 0.54 (0.11;2.5)                                                 | .43     | 0.91 (0.23;3.5)                                                  | .89     |
|                                | Employed                                                 | 1.0 (0.51;2.1)                                                  | .90     | 1.0 (0.43;2.3)                                                   | .99     |
| <b>CHILDREN</b>                | Base: No children (vs. at least one child)               | 1.4 (0.59;3.1)                                                  | .46     | 0.70 (0.41;1.2)                                                  | .21     |
| <b>AGE GROUP</b>               | (Base: Age 18-34)                                        |                                                                 |         |                                                                  |         |
|                                | Age 35-54                                                | 0.31 (0.10;0.90)                                                | .032    | 1.4 (0.78;2.6)                                                   | .26     |
|                                | Age 55+                                                  | 0.43 (0.12;1.5)                                                 | .18     | 1.2 (0.46;2.9)                                                   | .30     |
| <b>PRIMARY LANGUAGE SPOKEN</b> | Base: French (vs. English)                               | 0.99 (0.46;2.1)                                                 | .97     | 0.88 (0.43; 1.8)                                                 | .72     |

a: Multivariable Model; Comfort in Public Setting: Omnibus F-test:  $F(10,942)=1.30$ ;  $p=0.22$ . Goodness of Fit F-test:  $F(9,943)= 3097$ ;  $p<0.0001$

b: **Multivariable Model**; Comfort in Private Setting: Omnibus F-test:  $F(10,942) =2.98$ ;  $p=0.0011$ . Goodness of Fit F-test  $F(9,943) =1.6$ ;  $p=0.12$
